# Supplementary material for: Investigation on the physical properties and biocompatibility of zirconia–alumina-silicate@diopside composite materials and its in vivo toxicity study in embryonic zebrafish
Source: Royal Society of Chemistry journal article supplement (doi:10.1039/d3ra04555b), 2023-01-01
Supplement: d3ra04555b1.pdf [file d3ra04555b1.pdf]

The data analysis was conducted using IBM SPSS Statistics 26 software (SPSS Inc.). We rigorously assessed the assumption of homogeneity of variance (homoscedasticity) as part of our analysis. To determine statistical differences between the treatment and negative control groups, we employed a one-way analysis of variance (ANOVA), followed by post hoc Tukey's test for multiple comparisons. A significance threshold of  $p < 0.05$  was applied to define statistical significance. For your reference, detailed statistical results, including the ANOVA F-value, degrees of freedom, and corresponding p-values, are presented in Table S1-S6.

**Table S1** One-way ANOVA result for heart rate at 24 hpf of the ZAS-treated groups and the negative control.

| Variance       | Sum of Squares | Degree of freedom | Mean Square | F     | p value |
|----------------|----------------|-------------------|-------------|-------|---------|
| Between Groups | 319.611        | 5                 | 63.922      | 0.883 | 0.521   |
| Within Groups  | 868.667        | 12                | 72.389      |       |         |
| Total          | 1188.278       | 17                |             |       |         |

**Table S2** One-way ANOVA result for heart rate at 48 hpf of the ZAS-treated groups and the negative control.

| Variance       | Sum of Squares | Degree of freedom | Mean Square | F     | p value |
|----------------|----------------|-------------------|-------------|-------|---------|
| Between Groups | 471.778        | 5                 | 94.356      | 0.700 | 0.634   |
| Within Groups  | 1617.333       | 12                | 134.778     |       |         |
| Total          | 2089.111       | 17                |             |       |         |

**Table S3** One-way ANOVA result for heart rate at 24 hpf of the CMS-treated groups and the negative control.

| Variance       | Sum of Squares | Degree of freedom | Mean Square | F     | p value |
|----------------|----------------|-------------------|-------------|-------|---------|
| Between Groups | 279.111        | 5                 | 55.822      | 0.483 | 0.782   |
| Within Groups  | 1386.000       | 12                | 115.500     |       |         |
| Total          | 1665.111       | 17                |             |       |         |

**Table S4** One-way ANOVA result for heart rate at 48 hpf of the CMS-treated groups and the negative control.

| Variance       | Sum of Squares | Degree of freedom | Mean Square | F      | p value |
|----------------|----------------|-------------------|-------------|--------|---------|
| Between Groups | 5550.944       | 5                 | 1110.189    | 28.920 | 0.000   |
| Within Groups  | 460.667        | 12                | 38.389      |        |         |
| Total          | 6011.611       | 17                |             |        |         |

**Table S5** One-way ANOVA result for heart rate at 24 hpf of the ZASCMS50-treated groups and the negative control.

| Variance       | Sum of Squares | Degree of freedom | Mean Square | F     | p value |
|----------------|----------------|-------------------|-------------|-------|---------|
| Between Groups | 122.278        | 5                 | 24.456      | 0.796 | 0.573   |
| Within Groups  | 368.667        | 12                | 30.722      |       |         |
| Total          | 490.944        | 17                |             |       |         |

**Table S6** One-way ANOVA result for heart rate at 48 hpf of the ZASCMS50-treated groups and with the negative control.

| <b>Variance</b> | <b>Sum of Squares</b> | <b>Degree of freedom</b> | <b>Mean Square</b> | <b>F</b> | <b>p value</b> |
|-----------------|-----------------------|--------------------------|--------------------|----------|----------------|
| Between Groups  | 287.111               | 5                        | 57.422             | 0.361    | 0.865          |
| Within Groups   | 1906.667              | 12                       | 158.889            |          |                |
| Total           | 2193.778              | 17                       |                    |          |                |
